# Supplementary material
Source: Springer Nature journal article supplement (https://mijn.bsl.nl/resource/supplementary/13047_2009_128_MOESM3_ESM.pdf/7109956)
Supplement: MOESM3 [file 7109956]

# Efficacy analysis

# Exploratory analysis

**SCREENING OF REFERRALS**  
Assessment  
**n = 110**

Ineligible **n = 75**  
Unable to attend **n = 0**  
Unwilling to attend **n = 0**

**BASELINE**  
Consent  
Pain scores  
Issuing of FO  
**n = 35**

Unable to tolerate FO **n = 0**  
Lost to follow-up **n = 2**

**8 WEEKS**  
Face-to face review  
Pain scores  
**n = 33**

**SCREENING**  
**n = 13**

Unable to attend **n = 0**  
Unwilling to attend **n = 3**

**12 WEEKS**  
Telephone review  
Pain scores  
**n = 33**

**FULL DATA ANALYSIS**  
**n = 9**

Incomplete data **n = 1**

Unable to tolerate FO **n = 1**  
Lost to follow-up **n = 0**

**24 WEEKS**  
Telephone review  
Pain scores  
**n = 32**
